# Supplementary material
Source: publisher figshare collection journal article supplement (https://acs.figshare.com/ndownloader/files/5031154)

## Supporting Information

# Low-Molecular-Weight Organo- and Hydrogelators

## Based on Cyclo(*L*-Lys-*L*-Glu)

Huimin Geng<sup>a</sup>, Lin Ye<sup>a</sup>, Ai-ying Zhang<sup>a</sup>, Jingbo Li<sup>a,b</sup>, Zeng-guo Feng<sup>a,b</sup>

<sup>a</sup>School of Materials Science and Engineering, Beijing Institute of Technology, No. 5 South Street Zhongguancun, Beijing, 100081

<sup>b</sup>Beijing Key Laboratory of Construction Tailorable Advanced Functional Materials and Green Applications, No. 5 South Street Zhongguancun, Beijing, 100081

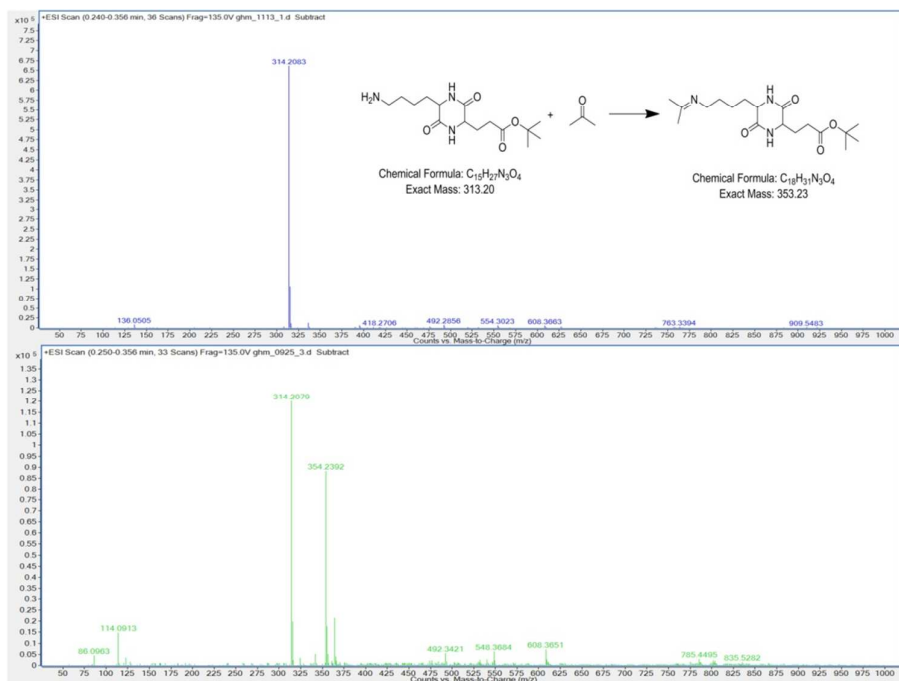

Figure S1 Mass spectra of gelator **3** (a) and red xerogel aged for 10 days in acetone (b).

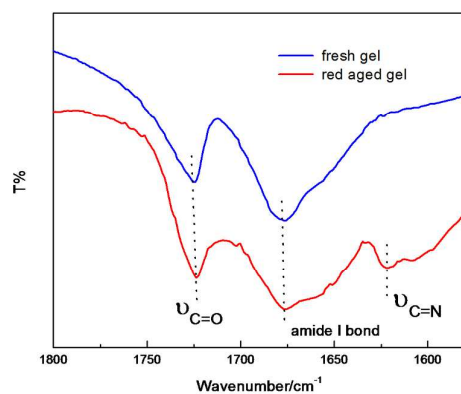

**Figure S2** FT-IR spectra of fresh xerogel and red xerogel aged for 10 days.

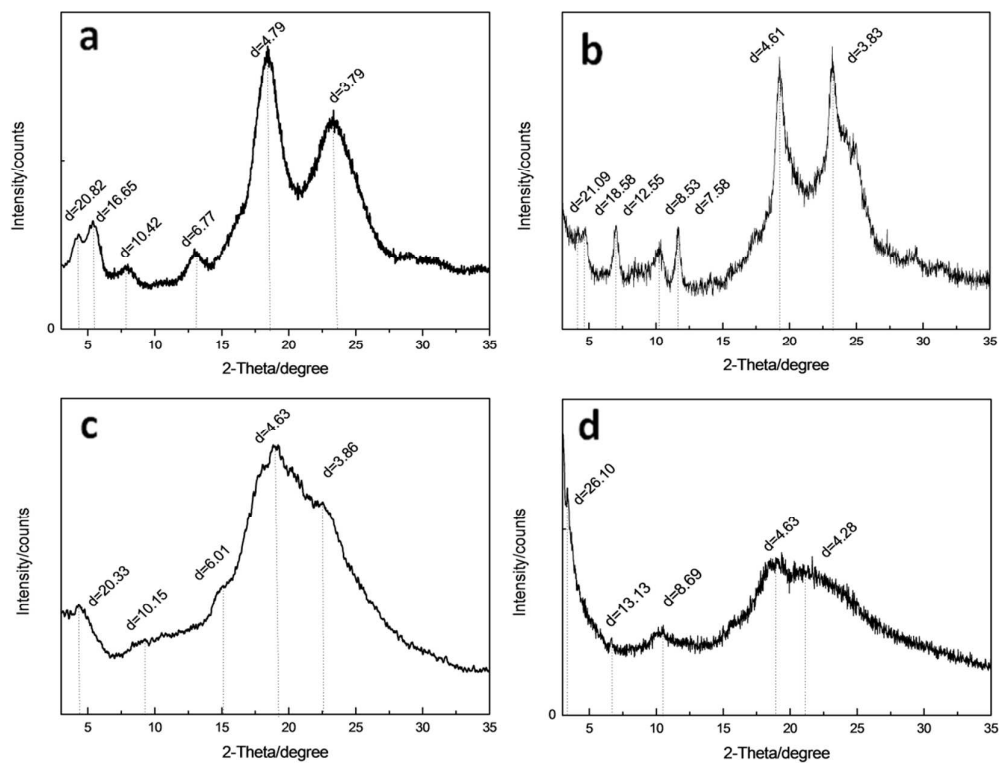

**Figure S3** XRD patterns of xerogel of **3** (a), **4** (b), **5** (c) and **6** (d) in n-butanol.

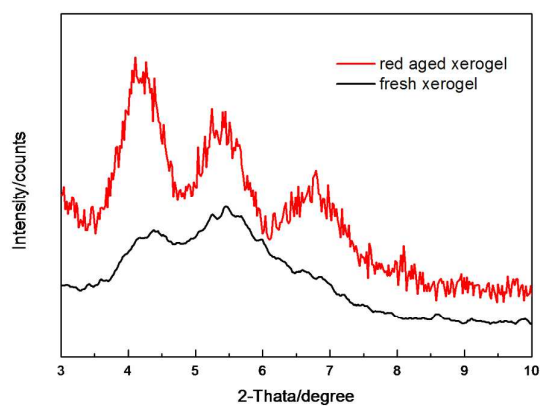

**Figure S4** XRD patterns of fresh gel and red xerogel aged for 10 days in acetone of **3**.

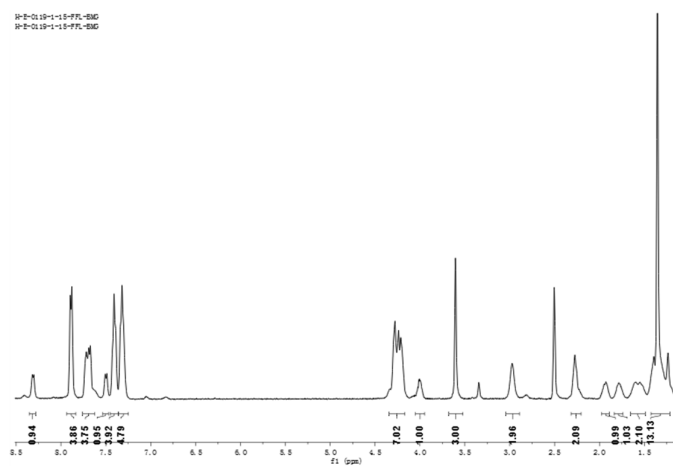

**Figure S5**  $^1\text{H}$  NMR spectrum of **2** (400 MHz,  $\text{DMSO}-d_6$ ).

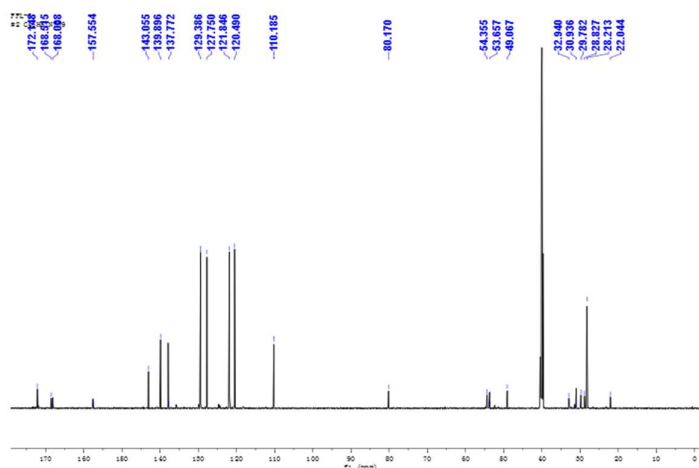

**Figure S6**  $^{13}\text{C}$  NMR spectrum of **2** (100 MHz,  $\text{DMSO}-d_6$ ).

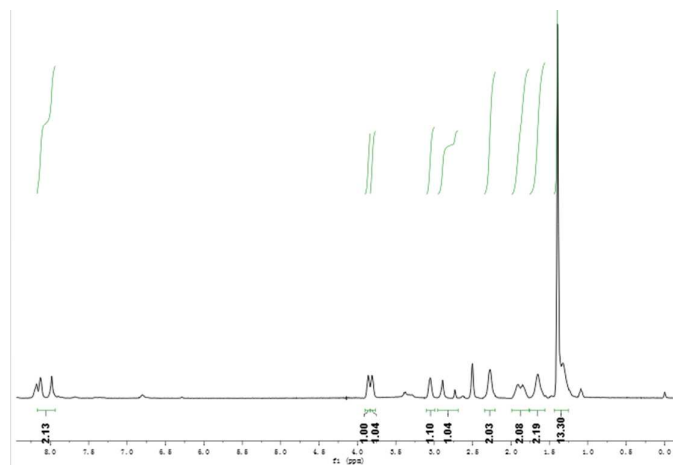

**Figure S7**  $^1\text{H}$  NMR spectrum of **3** (400 MHz,  $\text{DMSO}-d_6$ ).

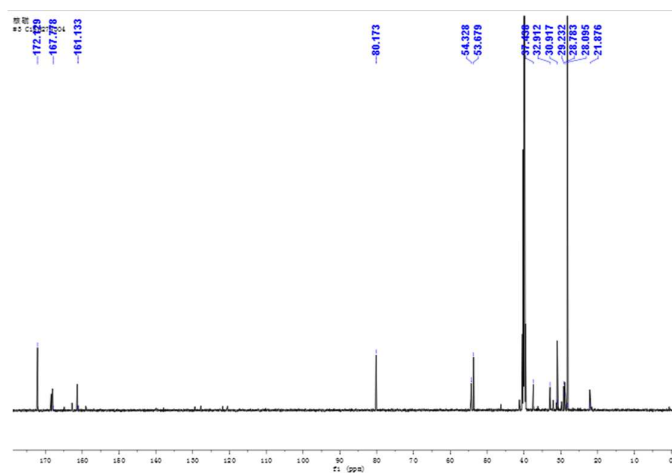

**Figure S8**  $^{13}\text{C}$  NMR spectrum of **3** (100 MHz,  $\text{DMSO}-d_6$ ).

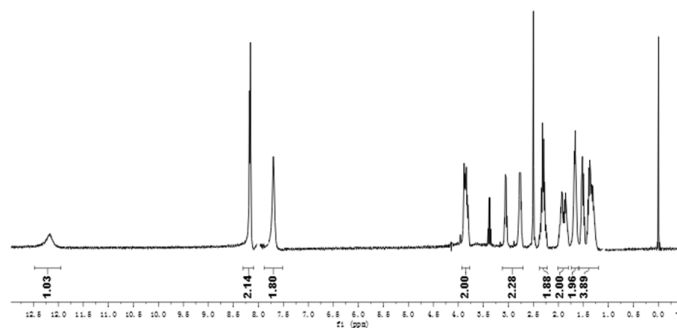

**Figure S9**  $^1\text{H}$  NMR spectrum of **4** (400 MHz,  $\text{DMSO}-d_6$ ).

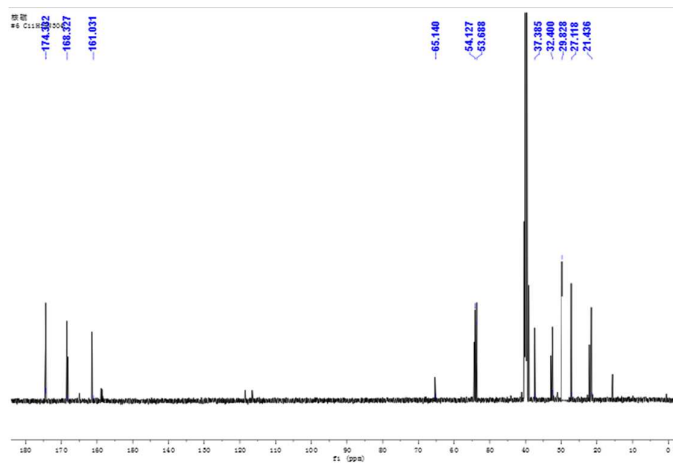

Figure S10  $^{13}\text{C}$  NMR spectrum of **4** (100 MHz,  $\text{DMSO}-d_6$ ).

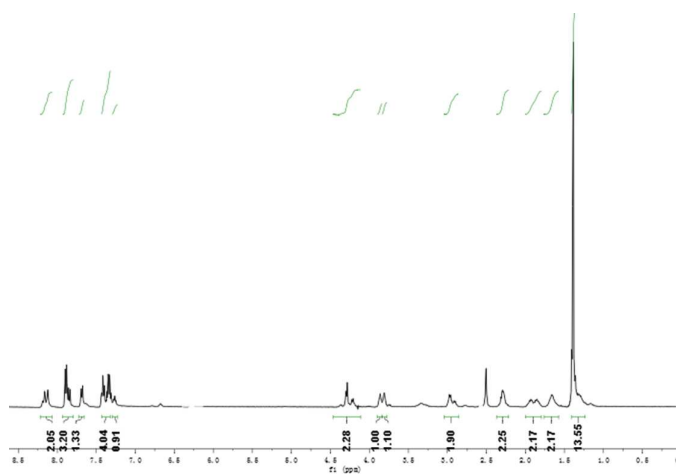

Figure S11  $^1\text{H}$  NMR spectrum of **5** (400 MHz,  $\text{DMSO}-d_6$ ).

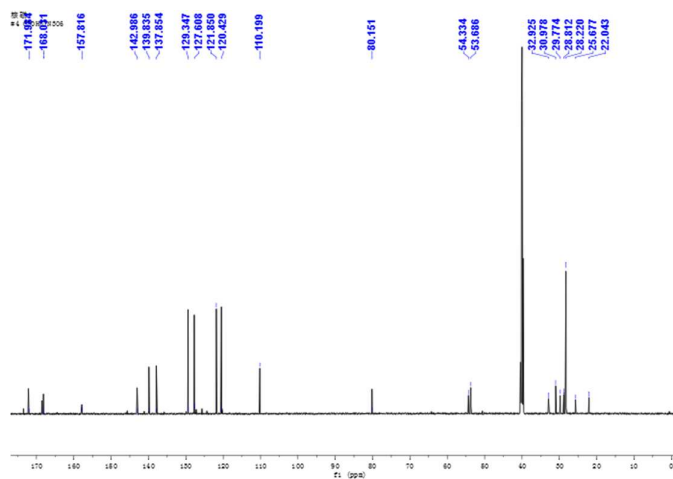

Figure S12  $^{13}\text{C}$  NMR spectrum of **5** (100 MHz,  $\text{DMSO}-d_6$ ).

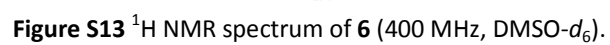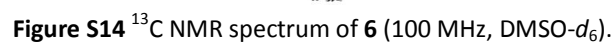

Supplement: Supplementary file 1 [file 5031154]
